# Supplementary material for: Maternal and Newborn Health in Karnataka State, India: The Community Level Interventions for Pre-Eclampsia (CLIP) Trial’s Baseline Study Results
Source: PLOS journal article supplement (doi:10.1371/journal.pone.0166623), 2017-01-20
Supplement: S2 (10.1371/journal.pone.0166623.s002) [file journal.pone.0166623.s002]

|                                                                            |                                                           |                                      |
|----------------------------------------------------------------------------|-----------------------------------------------------------|--------------------------------------|
| <b>University of British Columbia<br/>KLE University's JNMC &amp; SNMC</b> | <b>Maternal Newborn Health Registry<br/>SCREENING LOG</b> | <b>MN00</b>                          |
| <b>Page 1 of 1</b>                                                         |                                                           | <b>Version 2.0<br/>July 16, 2013</b> |

This registry should be maintained by the Registry Administrator for each study cluster. All pregnant women who are residents of the study cluster or who deliver in a facility or home within the cluster should be registered as early as possible during pregnancy. The registry should be entered in the DMS and transmitted to RTI on a weekly basis.

| <b>1. National or Ministry of Health ID # if known or 9999</b><br><br><b>Mother's name:</b> home address/cell phone number (length of residence, or other identifying information) may be written (not entered in DMS) | <b>2. Subject ID</b><br>[Place label] | <b>3. Date of screening</b><br>(dd-mm-yyyy) | <b>4. Is woman resident of cluster?</b><br>1=Yes<br>2=No | <b>5. Village ID</b><br>(residence at enrollment) | <b>6. Consent</b><br>1=Yes<br>2=No<br>3=Ineligible | <b>7. Has mother been enrolled in the MNH before?</b><br><br>1=Yes<br>2=No<br>3=DK | <b>8. MNH ID if known</b><br>If Q7 =yes, write MNH ID.If MNH ID unknown, year of prior enrollment. <i>If missing ID and year than enter 99999</i> |
|------------------------------------------------------------------------------------------------------------------------------------------------------------------------------------------------------------------------|---------------------------------------|---------------------------------------------|----------------------------------------------------------|---------------------------------------------------|----------------------------------------------------|------------------------------------------------------------------------------------|---------------------------------------------------------------------------------------------------------------------------------------------------|
|                                                                                                                                                                                                                        |                                       |                                             |                                                          | _ _ _ _                                           |                                                    |                                                                                    | _ _ _ _                                                                                                                                           |
|                                                                                                                                                                                                                        |                                       |                                             |                                                          | _ _ _ _                                           |                                                    |                                                                                    | _ _ _ _                                                                                                                                           |
|                                                                                                                                                                                                                        |                                       |                                             |                                                          | _ _ _ _                                           |                                                    |                                                                                    | _ _ _ _                                                                                                                                           |
|                                                                                                                                                                                                                        |                                       |                                             |                                                          | _ _ _ _                                           |                                                    |                                                                                    | _ _ _ _                                                                                                                                           |
|                                                                                                                                                                                                                        |                                       |                                             |                                                          | _ _ _ _                                           |                                                    |                                                                                    | _ _ _ _                                                                                                                                           |
